# Supplementary material for: Identification of Methylated Genes Associated with Aggressive Bladder Cancer
Source: PLOS journal article supplement (doi:10.1371/journal.pone.0012334), 2010-08-23
Supplement: S4 (10.1371/journal.pone.0012334.s004) [file journal.pone.0012334.s004]

**Table S2. Individual Gene Promoter Methylation is Associated with High Grade in Non-invasive Bladder Cancer**

|                                    | <b>Grade 1,2</b> | <b>Grade 3</b> | <b>Grade 3 OR</b> | <b>Grade 1,2</b> | <b>Grade 3</b> | <b>Grade 3 OR</b> | <b>Grade 1,2</b> | <b>Grade 3</b> | <b>Grade 3 OR</b> |
|------------------------------------|------------------|----------------|-------------------|------------------|----------------|-------------------|------------------|----------------|-------------------|
|                                    | <b>n(%)</b>      | <b>n(%)</b>    | <b>(95% CI)</b>   | <b>n(%)</b>      | <b>n(%)</b>    | <b>(95% CI)</b>   | <b>n(%)</b>      | <b>n(%)</b>    | <b>(95% CI)</b>   |
| Total N                            | 154              | 23             |                   | 150              | 20             |                   | 149              | 22             |                   |
| <b>FRZB Methylation Extent</b>     |                  |                |                   |                  |                |                   |                  |                |                   |
| low (< median)                     | 86 (92)          | 7 (8)          | 1.0 (referent)    |                  |                |                   |                  |                |                   |
| high (≥ median)                    | 68 (81)          | 16 (19)        | 2.9 (1.1, 7.9)    |                  |                |                   |                  |                |                   |
| <b>KRT13 Methylation Extent</b>    |                  |                |                   |                  |                |                   |                  |                |                   |
| low (< median)                     |                  |                |                   | 86 (95)          | 5 (5)          | 1.0 (referent)    |                  |                |                   |
| high (≥ median)                    |                  |                |                   | 64 (81)          | 15 (19)        | 3.3 (1.1, 10.1)   |                  |                |                   |
| <b>HOXB2 Methylation Extent</b>    |                  |                |                   |                  |                |                   |                  |                |                   |
| low (< median)                     |                  |                |                   |                  |                |                   | 102 (93)         | 8 (7)          | 1.0 (referent)    |
| high (≥ median)                    |                  |                |                   |                  |                |                   | 47 (77)          | 14 (23)        | 2.6 (0.9, 6.9)    |
| <b>TP53 IHC Staining Intensity</b> |                  |                |                   |                  |                |                   |                  |                |                   |
| Low (<3)                           | 144 (90)         | 16 (10)        | 1.0 (referent)    | 140 (91)         | 14 (9)         | 1.0 (referent)    | 139 (90)         | 15 (10)        | 1.0 (referent)    |
| High (3+)                          | 10 (59)          | 7 (41)         | 7.1 (2.2, 22.5)   | 10 (62)          | 6 (38)         | 5.8 (1.7, 19.6)   | 10 (59)          | 7 (41)         | 5.1 (1.6, 16.6)   |

Each model is controlled for variables in columns, as well as age and gender.
